# Supplementary material
Source: PubMed Central journal article supplement (PMC5886165)
Supplement: ddx403_supplemental_information_1023_2017.pdf [file ddx403_supplemental_information_1023_2017.pdf]

## Supplementary Information

**Drosophila longevity assays**—Flies were maintained with the standard cornmeal-yeast medium (Nutri-Fly BF, Genesee scientific) supplemented with propionic acid and all crosses were performed at 23°C except where indicated. Longevity analysis and climbing assay were modified from methods described previously (63). For longevity analysis, flies were aged at 30°C and survival was recorded every day. For each individual experiment, lifespan of *elav/+* flies was recorded to account for environmental variations on the flies. Food was changed every 2-3 days. Log-rank (Mantel-Cox) test was performed for survival analysis.

## Supplementary data

**Figure S1. (A)** Alignment of N-terminal regions of UBQLN1 and UBQLN2. Orange corresponds to UBQLN2 specific PXXP motifs. Blue corresponds to UBL domain. **(B)** Solubility of UBQLN2 is higher than UBQLN1 in 1% Triton-X 100 buffer. Solubility was measured by densitometric analysis and normalized to total (sum of soluble and pellet) input (n=5, *p-value*=0.017).

**Figure S2.** Schematic of CRISPR mediated knockout of *UBQLN2* in MEFs.

**Figure S3.** ALS mutations in UBQLN2 are additive and expose amino-terminal epitopes. *UBQLN2*<sup>-/-</sup> MEFs were transfected with the indicated Myc-tagged UBQLN2 expression constructs. The cells were lysed with NP-40 buffer, and separated into soluble and pellet fractions and analyzed by immunoblotting with the indicated antibodies. The NP-40 soluble fractions were immunoprecipitated with  $\alpha$ -Myc antibody and immunoblotted with  $\alpha$ -Myc,  $\alpha$ -UBQLN2 and  $\alpha$ -Ub antibodies.

**Figure S4. (A)** UBQLN2 ALS mutants show enhanced Ub association *in vitro*. GST-tagged UBQLN2<sup>WT</sup>, UBQLN2<sup>P497H</sup>, UBQLN2<sup>P525S</sup>, UBQLN2<sup>P3X</sup> and UBQLN2<sup>P4X</sup> expressed in an *E. coli* were incubated with monoUb-conjugated agarose beads and input and bound fractions analyzed by immunoblotting with  $\alpha$ -GST or stained with Coomassie blue. **(B)** UBA mutation of UBQLN2 diminished Ub binding. GST-tagged UBQLN2<sup>WT</sup>, UBQLN2<sup>P497H</sup>, UBQLN2<sup>P497H/UBA\*</sup>, UBQLN2<sup>P4X</sup> and UBQLN2<sup>P4X/UBA\*</sup> expressed in an *E. coli* were incubated with monoUb-conjugated agarose beads and input and bound fractions analyzed by immunoblotting with  $\alpha$ -GST.

**Figure S5.** Expression of wild-type and ALS mutant UBQLN2 proteins leads to an increase in cellular Ub. Head extracts from GMR>UBQLN2<sup>WT</sup>, and GMR>UBQLN2<sup>P497H</sup>, GMR>UBQLN2<sup>P525S</sup>, and GMR>UBQLN2<sup>P4X</sup> flies were separated into soluble and insoluble fractions in RIPA buffer and immunoblotted with  $\alpha$ -UBQLN2,  $\alpha$ -Ub, and  $\alpha$ - $\beta$ -tubulin antibodies at different times post-eclosion.

**Figure S6.** Expression of UBQLN2 ALS mutants leads to bristle loss. **(A)** Cuticle imprints and external eye images from 10 day-old flies of GMR>Gal4, GMR>UBQLN2<sup>WT</sup>, GMR>UBQLN2<sup>P497H</sup> and GMR>UBQLN2<sup>P525S</sup> exhibiting a loss of bristle phenotype. **(B)** Quantification of interommatidial bristle loss in GMR>Gal4, GMR>UBQLN2<sup>WT</sup>, GMR>UBQLN2<sup>P497H</sup>, and GMR>UBQLN2<sup>P525S</sup> flies.

**Figure S7.** Genetic interactions between UBQLN2 and other ALS genes. External eye images from homozygous GMR>UBQLN2<sup>WT</sup> and GMR>UBQLN2<sup>P525S</sup> flies crossed to flies expressing

wild-type or ALS-mutant alleles of TDP-43 or FUS or a fly line expressing 30 copies of a GGGGCC HRE representative of expansions from the C9ORF72 locus.

**Figure S8.** Colocalization between UBQLN2<sup>P4X</sup> and Ub. Whole brains from Elav>UBQLN2<sup>P4X</sup> flies were stained with  $\alpha$ -UBQLN2 and  $\alpha$ -Ub antibodies and imaged by confocal microscopy.

**Figure S9.** UBQLN2<sup>ALS</sup> mutants exhibit age-related colocalization with p62. **(A-C)** Localization patterns of wild-type and ALS mutant UBQLN2 proteins with p62 in different age flies. Whole brains of 0, 7, 14, 21 day old-flies from UBQLN2<sup>WT</sup> (A), UBQLN2<sup>P497H</sup> (B), and UBQLN2<sup>P4X</sup> (C) flies were stained with  $\alpha$ -UBQLN2 and  $\alpha$ -p62 antibodies and imaged by confocal microscopy.

**Figure S10.** Representative NMJ images from Elav>Gal4, Elav>UBQLN2<sup>WT</sup>, Elav>UBQLN2<sup>P497H</sup>, and Elav>UBQLN2<sup>P4X</sup> larvae. Larval NMJs were stained with HRP and DLG antibodies as described in Materials and Methods and imaged by confocal microscopy.

**Figure S11.** Lifespan of indicated fly lines expressing UBQLN2 transgenes from 51D and 85Fb integration sites under control of Elav. Elav>Gal4 and Elav>UBQLN2 flies of indicated genotypes were maintained at 30°C and survival assessed by Kaplan-Meier analysis. N= 50-100 male flies.

**Figure S12.** UBQLN2<sup>P4X</sup> mutants exhibit reduced climbing ability. Climbing ability of Elav>Gal4 and Elav>UBQLN2<sup>P4X</sup> flies was measured at 10-days post-eclosion as described in Materials and Methods.
