# Supplementary material
Source: PubMed Central journal article supplement (PMC5886165)

**A**

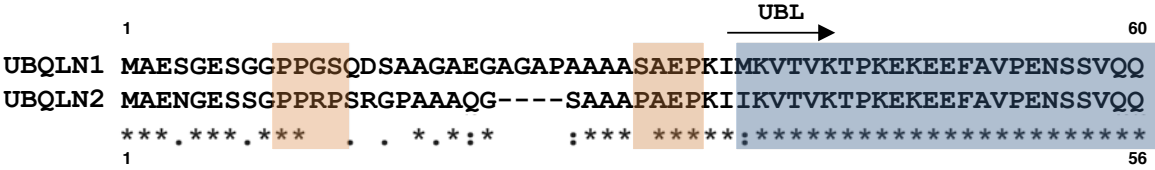

**B**

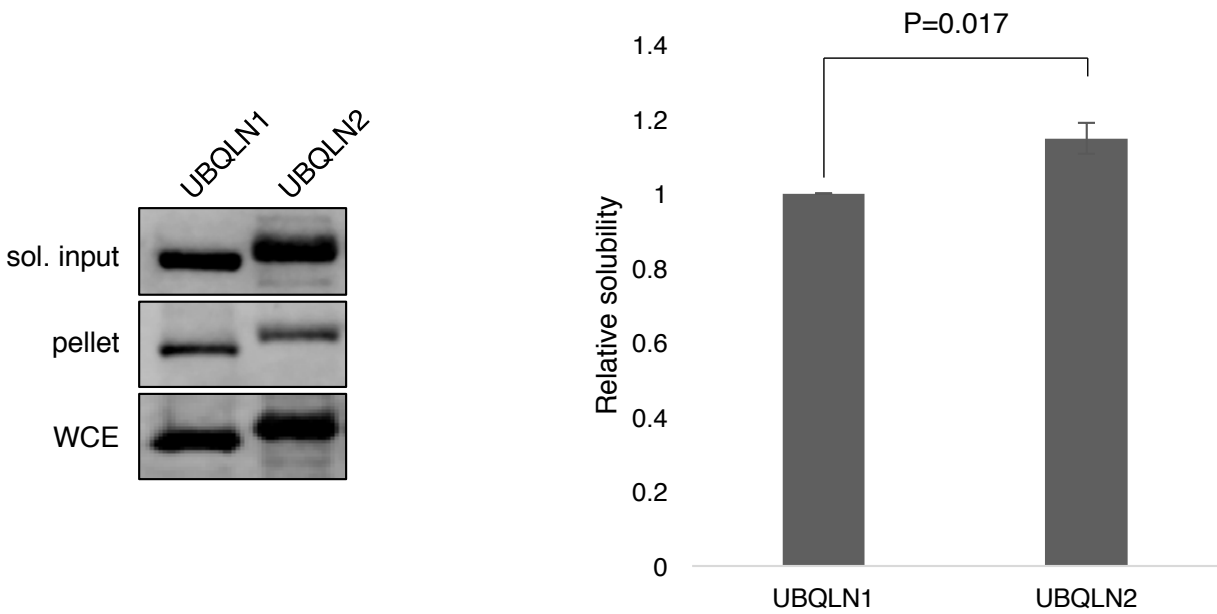

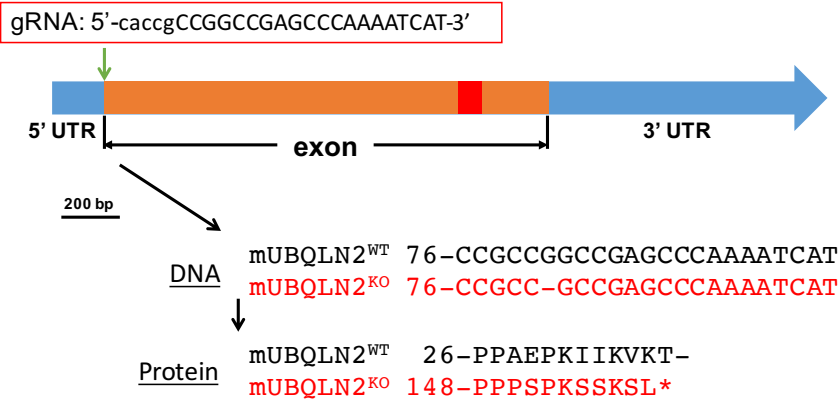

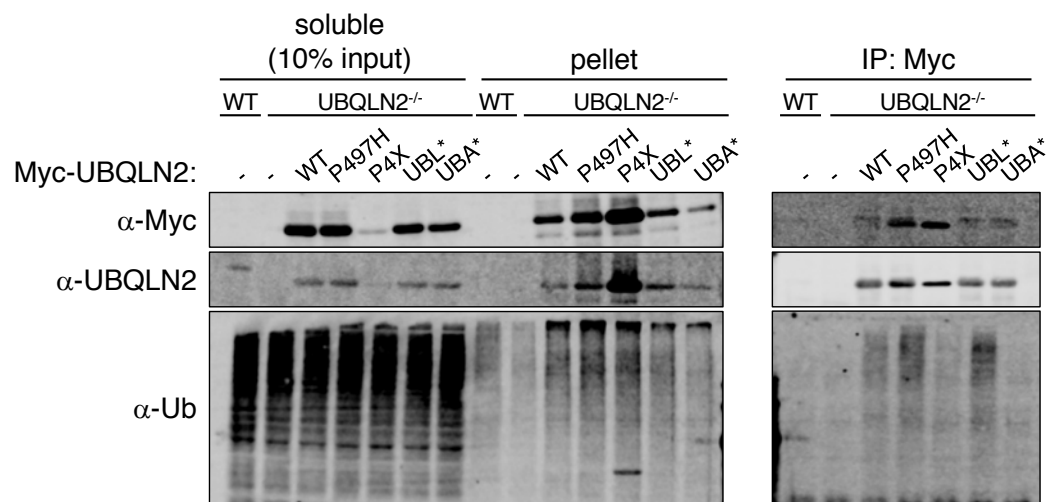

**A**

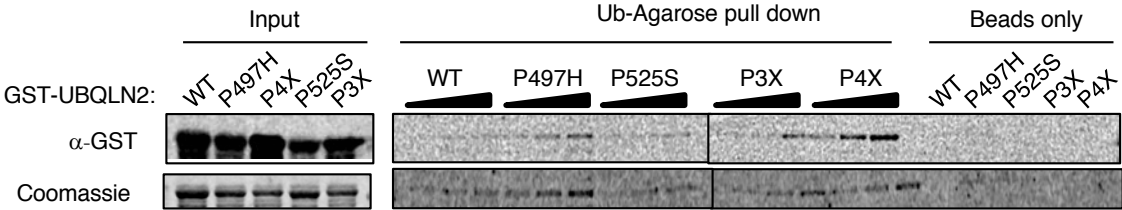

**B**

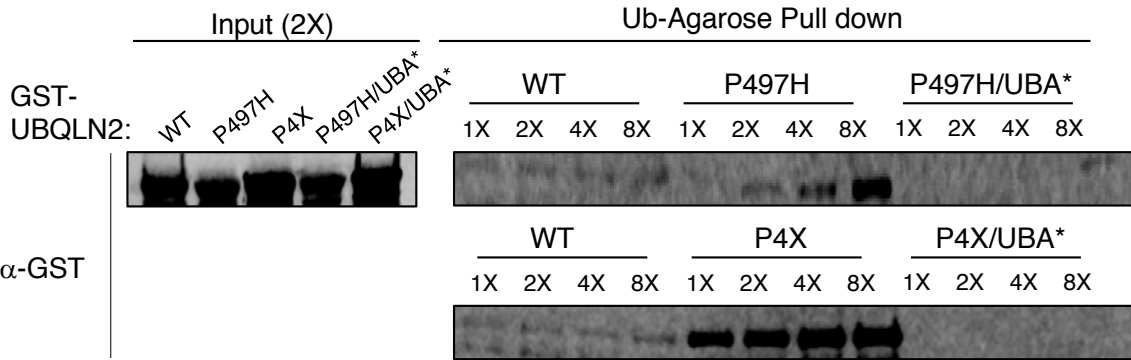

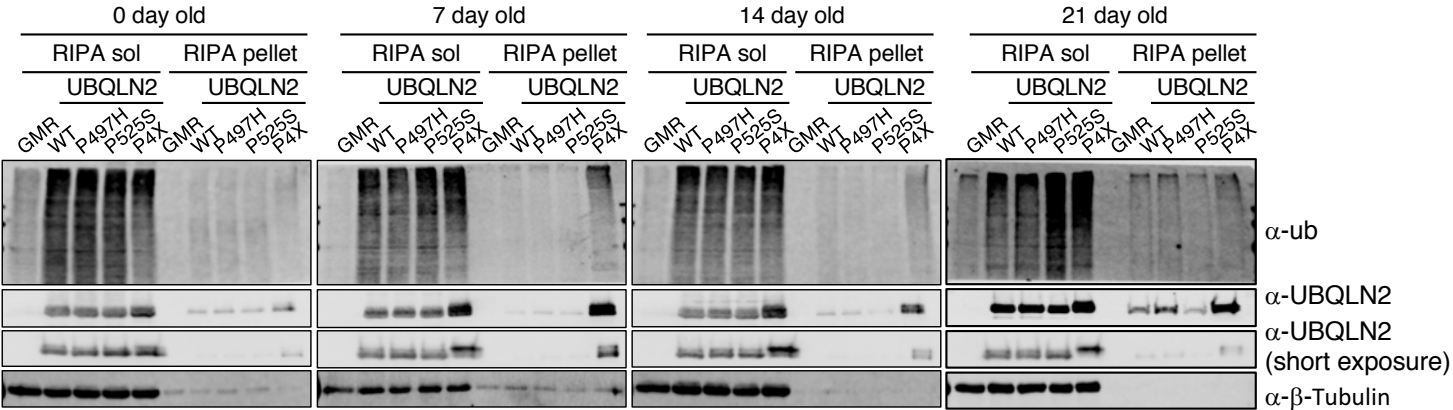

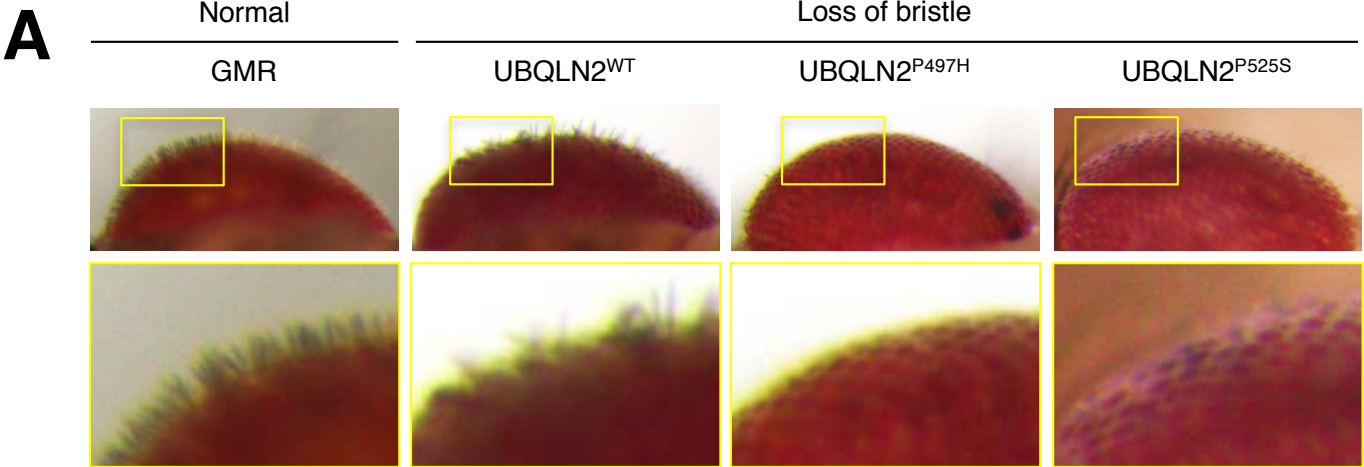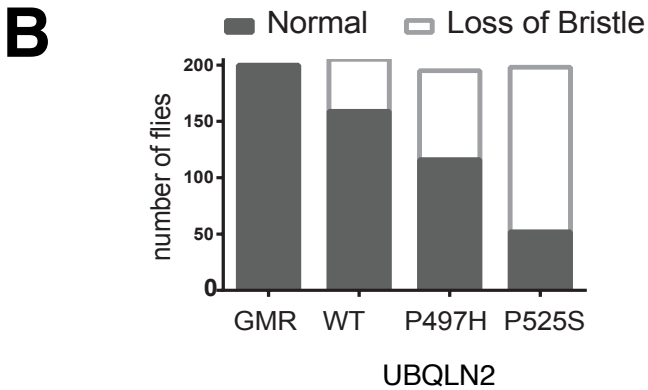

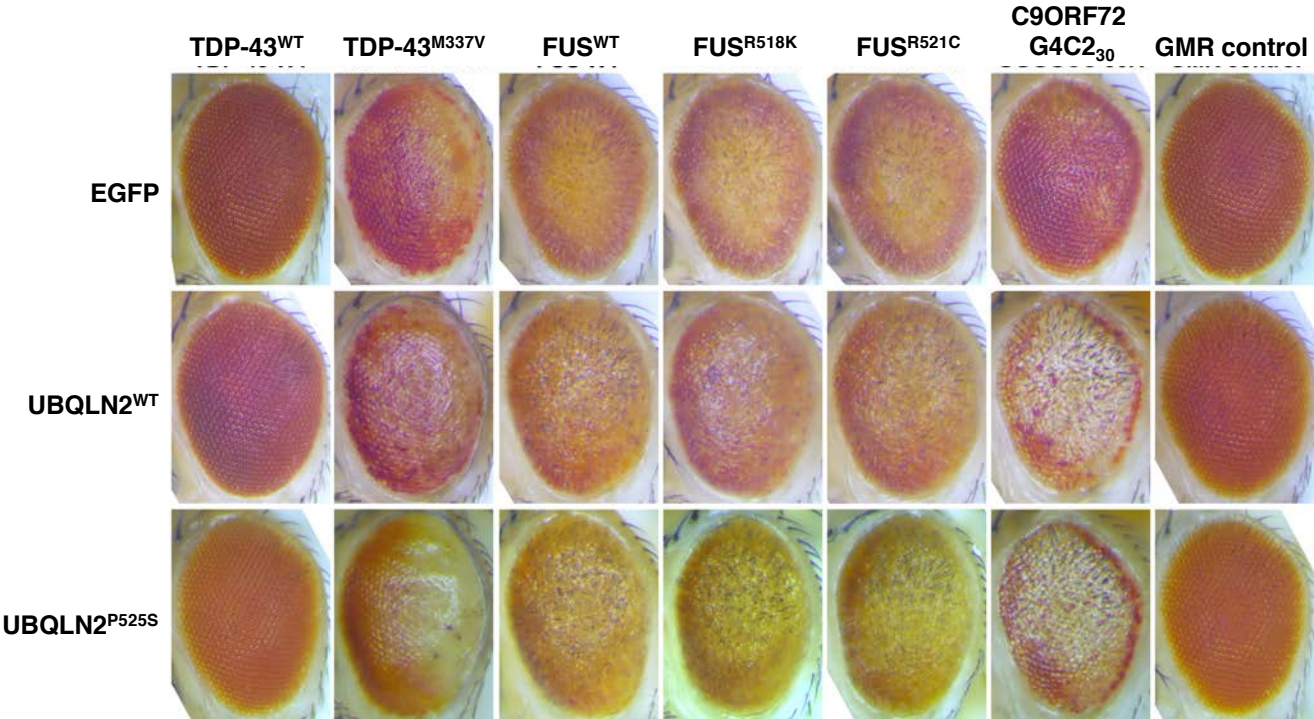

Elav>UBQLN2<sup>P4X</sup>

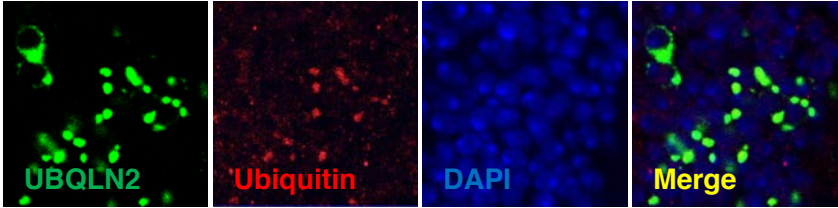



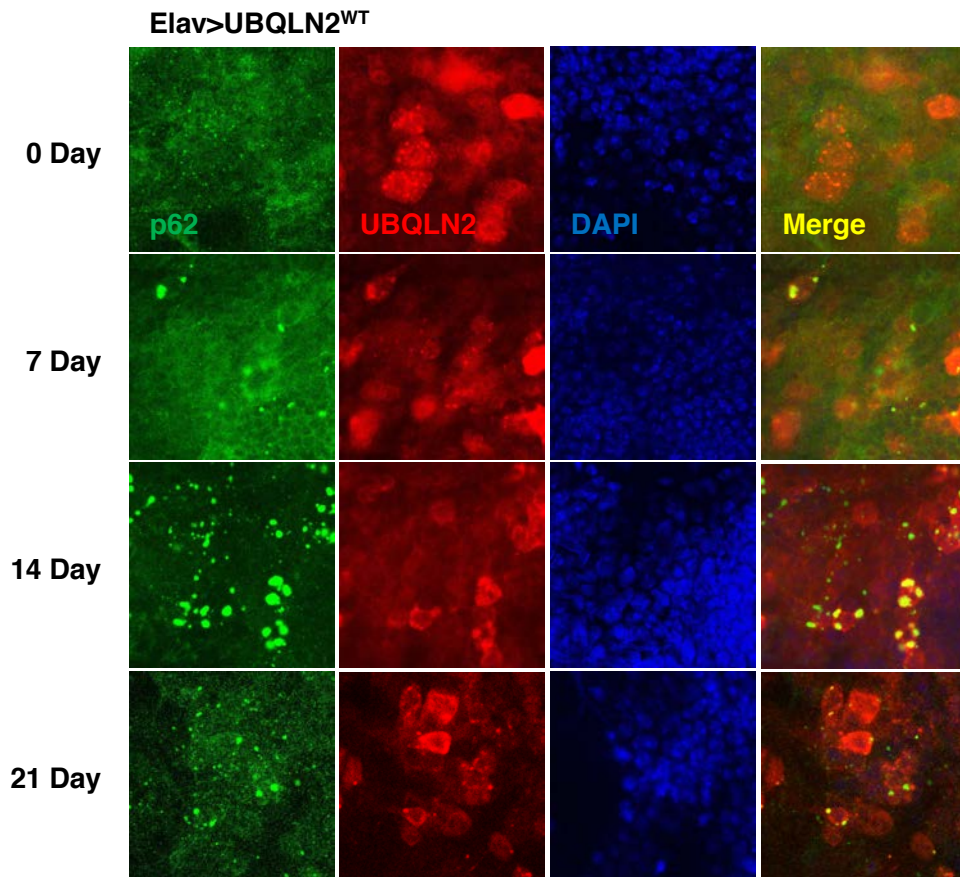

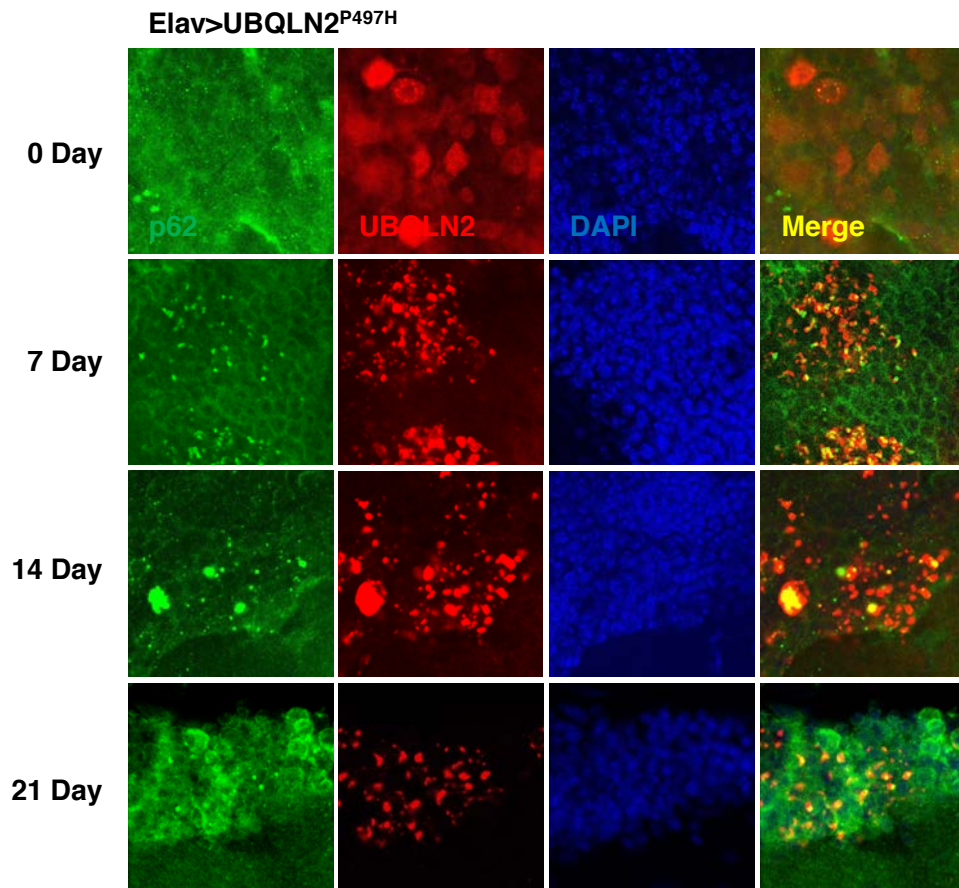

Elav>UBQLN2<sup>P4X</sup>

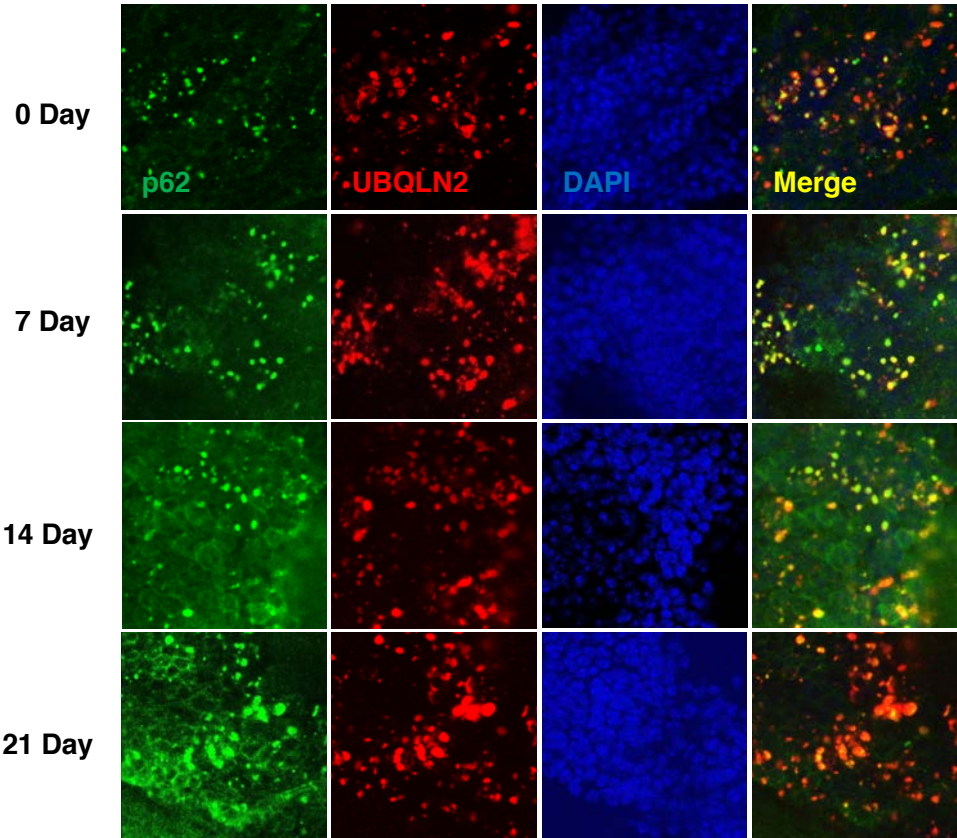

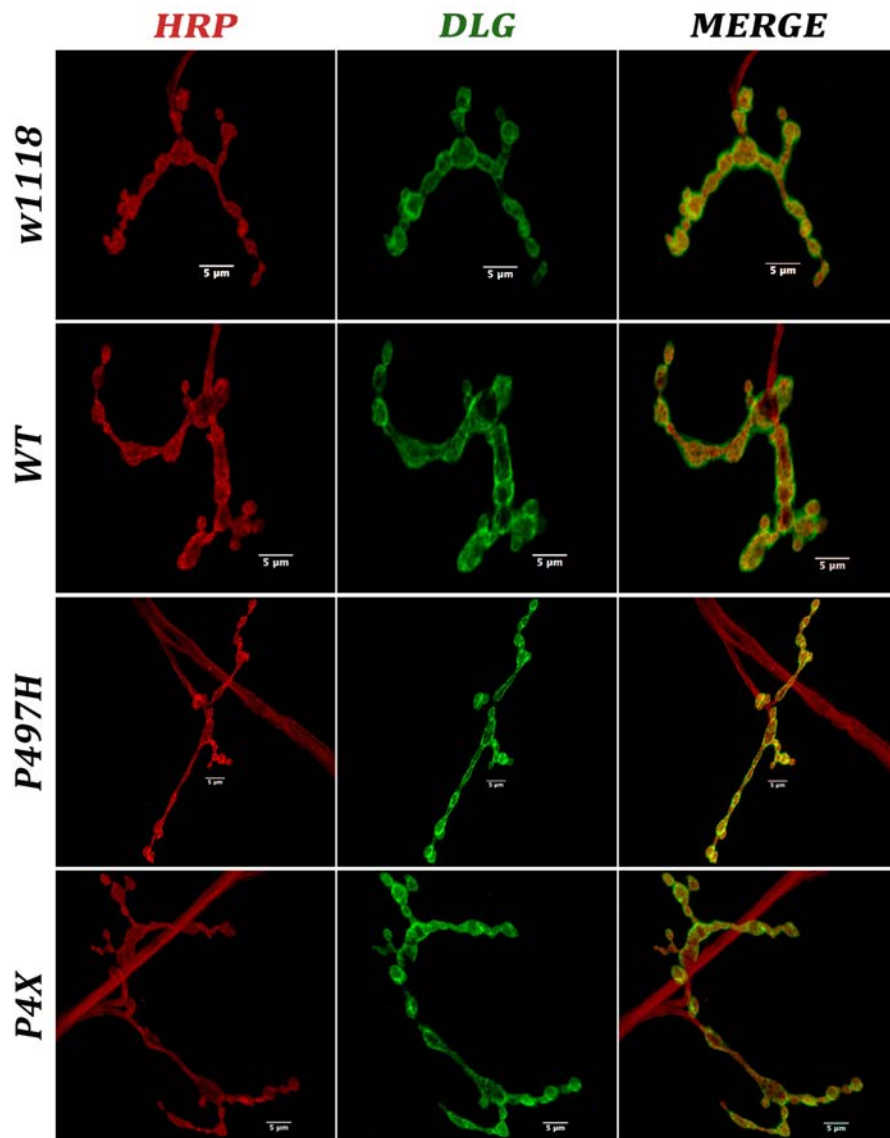

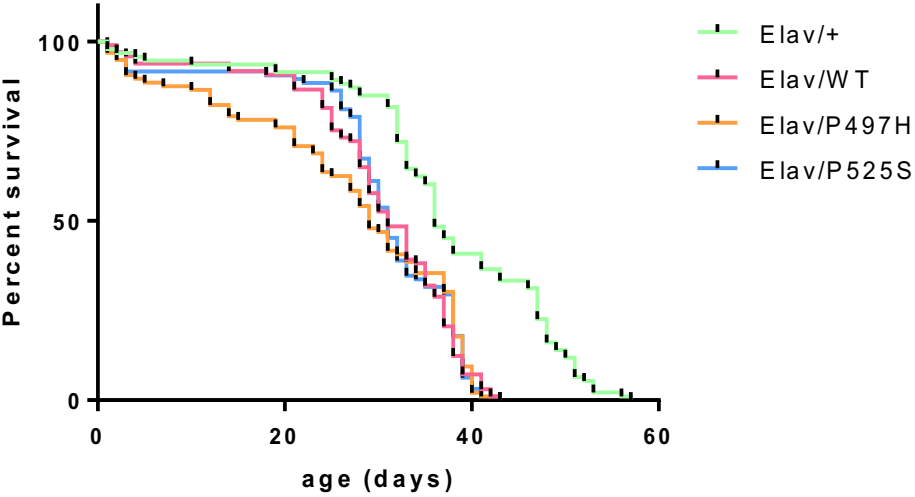

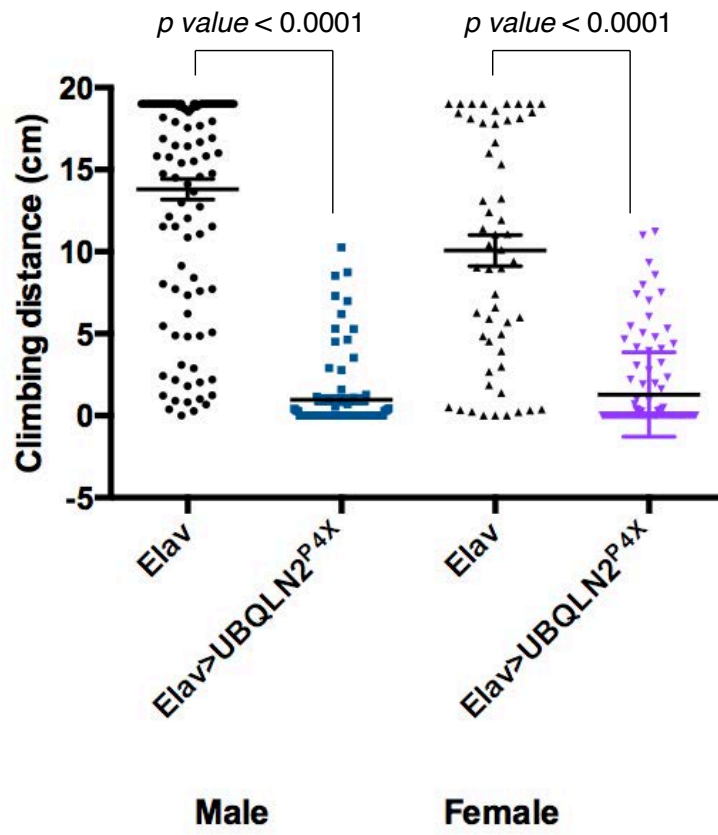

Supplement: ddx403_kim_et_al_figures_(supp)_s_10_23_2017.pdf [file ddx403_kim_et_al_figures_%28supp%29_s_10_23_2017.pdf]
